# Supplementary material for: Health Service Utilization Patterns Among Adults With Congenital Heart Disease: A Population‐Based Study
Source: PubMed Central journal article supplement — J Am Heart Assoc. 2021 Jan 12;10(2):e018037. doi: 10.1161/JAHA.120.018037 (PMC7955316; doi:10.1161/jaha.120.018037), 2021-01-12
Supplement: JAH3-10-e018037-s001.pdf [file JAH3-10-e018037-s001.pdf]

# **SUPPLEMENTAL MATERIAL**

**Table S1. Congenital heart disease diagnosis code groups (a) and congenital heart disease related procedures used to identify congenital lesions (b)**

| <b>a. Heart defect group</b>          | <b>ICD-9 code</b>                                                                                           |
|---------------------------------------|-------------------------------------------------------------------------------------------------------------|
| Aortic valve stenosis/insufficiency   | 746.3, 746.4                                                                                                |
| Transposition of great arteries (TGA) | 745.1                                                                                                       |
| Atrial Septal Defect (ASD)            | 745.5                                                                                                       |
| Mitral valve stenosis/insufficiency   | 746.5, 746.6, 746.7                                                                                         |
| Pulmonary Valve anomaly (PV) anomaly  | 746.0                                                                                                       |
| Anomalies of the Aorta                | 747.1, 747.2                                                                                                |
| Ebstein anomaly of Tricuspid Valve    | 746.2                                                                                                       |
| Tetralogy of Fallot (TOF)             | 745.2                                                                                                       |
| Common/single ventricle               | 745.3, 746.01, 746.1                                                                                        |
| Ventricular septal defect (VSD)       | 745.4                                                                                                       |
| Endocardial cushion                   | 745.6                                                                                                       |
| Patent ductus arteriosus (PDA)        | 747.0                                                                                                       |
| Other defects                         | 648.51, 648.52, 648.53, 746.9, 745.0, 745.11,<br>745.7, 747.3, 747.40, 747.49, 745.8, 745.9, 746.,<br>746.8 |

---

**b. Procedure**

---

|                          |       |
|--------------------------|-------|
| PROSTH REP HRT SEPTA NOS | 35.50 |
| PROS REP ATRIAL DEF-OPN  | 35.51 |
| PROS REPAIR ATRIA DEF-CL | 35.52 |
| PROST REPAIR VENTRIC DEF | 35.53 |
| PROS REP VSD             | 35.55 |
| GRFT REPAIR HRT SEPT NOS | 35.60 |
| GRAFT REPAIR ATRIAL DEF  | 35.61 |
| GRAFT REPAIR VENTRIC DEF | 35.62 |
| HEART SEPTA REPAIR NOS   | 35.70 |
| ATRIA SEPTA DEF REP NEC  | 35.71 |
| VENTR SEPTA DEF REP NEC  | 35.72 |
| ENDOCAR CUSHION REP NEC  | 35.73 |
| TOT REPAIR TETRAL FALLOT | 35.81 |
| TOT COR TRANSPOS GRT VES | 35.84 |
| INTERAT VEN RETRN TRANSP | 35.91 |
| CONDUIT RT VENT-PUL ART  | 35.92 |
| CONDUIT ARTIUM-PULM ART  | 35.94 |
| CAVAL-PULMON ART ANASTOM | 39.21 |

---

**Table S2. Distribution of non-cardiac congenital defects.**

|                          | N   | (%)   |
|--------------------------|-----|-------|
| Neurologic               | 22  | (0.2) |
| Cranio-Face              | 129 | (1.1) |
| Respiratory              | 35  | (0.3) |
| Gastrointestinal         | 24  | (0.2) |
| Genitourinary            | 210 | (1.8) |
| Muscoskeletal            | 297 | (2.5) |
| <i>Genetic syndromes</i> |     |       |
| Marfan syndrome          | 22  | (0.2) |
| Down syndrome            | 46  | (0.4) |

**Table S3. Characteristics and health service utilization frequency of 11,653 ACHD patients with congenital heart disease.**

|                                           | Sex         |             |        | Disease complexity |              |            |        |
|-------------------------------------------|-------------|-------------|--------|--------------------|--------------|------------|--------|
|                                           | Men         | Women       | p      | Simple             | Intermediate | Complex    | p      |
| <i>Cardiac Morbidity N (%)</i>            |             |             |        |                    |              |            |        |
| Arrhythmia                                | 916 (16.5)  | 1154 (18.9) | 0.0007 | 1512 (17.5)        | 431 (17.5)   | 127 (22.7) | 0.007  |
| Valve disease                             | 916 (16.5)  | 1154 (18.9) | <.0001 | 527 (6.1)          | 351 (14.3)   | 113 (20.2) | <.0001 |
| Ischemic HD                               | 997 (18.0)  | 749 (12.3)  | <.0001 | 1313 (15.2)        | 364 (14.8)   | 69 (12.3)  | 0.2    |
| Heart failure                             | 472 (8.5)   | 436 (7.1)   | 0.006  | 630 (7.3)          | 203 (8.3)    | 75 (13.4)  | <.0001 |
| Other HD                                  | 924 (16.6)  | 888 (14.6)  | 0.002  | 1176 (13.6)        | 501 (20.4)   | 135 (24.2) | <.0001 |
| <i>Other Morbidity N (%)</i>              |             |             |        |                    |              |            |        |
| Diabetes mellitus                         | 728 (13.1)  | 808 (13.2)  | 0.8    | 1148 (13.3)        | 339 (13.8)   | 49 (8.8)   | 0.005  |
| Hypertension                              | 1773 (31.9) | 1981 (32.5) | 0.5    | 2799 (32.4)        | 829 (33.7)   | 126 (22.5) | <.0001 |
| hyperlipidemia                            | 1619 (29.2) | 1718 (28.2) | 0.2    | 2512 (29.1)        | 712 (29.0)   | 113 (20.2) | <.0001 |
| Stroke/TIA                                | 729 (13.1)  | 846 (13.9)  | 0.2    | 1289 (14.9)        | 240 (9.8)    | 46 (8.2)   | <.0001 |
| Kidney failure                            | 30 (0.5)    | 14 (0.2)    | 0.006  | 34 (0.4)           | 9 (0.4)      | 1 (0.2)    | 0.7    |
| <i>Residence locality ethnicity N (%)</i> |             |             |        |                    |              |            |        |
| Jewish / Other                            | 3849 (69.4) | 4246 (69.8) | 0.2    | 565 (6.6)          | 167 (6.8)    | 60 (10.8)  | 0.003  |
| Arab                                      | 403 (7.3)   | 389 (6.4)   |        | 5992 (69.6)        | 1732 (70.6)  | 371 (66.5) |        |

|                                                           | Sex         |             |        | Disease complexity |              |            |        |
|-----------------------------------------------------------|-------------|-------------|--------|--------------------|--------------|------------|--------|
|                                                           | Men         | Women       | p      | Simple             | Intermediate | Complex    | p      |
| Mixed                                                     | 1293 (23.3) | 1444 (23.8) |        | 2056 (23.9)        | 554 (22.6)   | 127 (22.8) |        |
| <i>Residence locality Peripherality N (%)</i>             |             |             |        |                    |              |            |        |
| Very peripheral                                           | 121 (2.2)   | 106 (1.7)   | 0.3    | 174 (2.0)          | 47 (1.9)     | 6 (1.1)    | 0.01   |
| Peripheral                                                | 710 (12.8)  | 749 (12.3)  |        | 1052 (12.2)        | 334 (13.6)   | 73 (13.1)  |        |
| Medium                                                    | 996 (18.0)  | 1097 (18.0) |        | 1546 (18.0)        | 443 (18.1)   | 104 (18.6) |        |
| Central                                                   | 1140 (20.6) | 1314 (21.6) |        | 1890 (21.9)        | 451 (18.4)   | 113 (20.3) |        |
| Very Central                                              | 2576 (46.5) | 2813 (46.3) |        | 3950 (45.9)        | 1177 (48.0)  | 262 (47.0) |        |
| <i>Service utilization Frequency/5 years Median (IQR)</i> |             |             |        |                    |              |            |        |
| Primary care visits                                       | 28 (15-49)  | 36 (21-58)  | <.0001 | 33 (18-55)         | 32 (16-54)   | 32 (17-57) | 0.04   |
| Outpatient Cardiology visits                              | 3 (1-7)     | 3 (1-6)     | 0.03   | 3 (1-6)            | 3 (1-7)      | 3 (1-8)    | 0.0001 |
| ED only visits                                            | 0 (0-2)     | 1 (0-2)     | <.0001 | 1 (0-2)            | 0 (0-2)      | 1 (0-2)    | 0.06   |
| Hospital admissions                                       | 1 (0-2)     | 1 (0-2)     | 0.8    | 1 (0-2)            | 1 (0-2)      | 1 (0-3)    | 0.002  |
| Days in hospital                                          | 7 (3-20)    | 6 (2-19)    | 0.0004 | 7 (2-19)           | 7 (2-19)     | 10 (2-33)  | 0.002  |
| Days in ICU                                               | 0 (0-0)     | 0 (0-0)     | <.0001 | 0 (0-0)            | 0 (0-0)      | 0 (0-1)    | <.0001 |

ED-emergency department, HD- heart disease; ICU-intensive care unit, IQR-interquartile range; TIA-transient ischemic attack

**Table S4. Health service utilization hazard under age and congenital heart disease complexity interaction.**

|                                 |                         | Primary care visits |             | Cardiology outpatient visits | ED visits        | Hospitalization  |
|---------------------------------|-------------------------|---------------------|-------------|------------------------------|------------------|------------------|
| Age                             | Complexity (ref=simple) | HR                  | (95% CI)    | HR (95% CI)                  | HR (95% CI)      | HR (95% CI)      |
| 18-24                           | Complex                 | 0.92                | (0.86-0.97) | 1.50 (1.33-1.69)             | 1.01 (0.82-1.26) | 1.59 (1.17-2.18) |
|                                 | Intermediate            | 0.96                | (0.92-1.01) | 1.15 (1.04-1.27)             | 0.90 (0.75-1.08) | 0.90 (0.62-1.32) |
| 25-44                           | Complex                 | 1.04                | (1.00-1.09) | 1.21 (1.12-1.31)             | 1.11 (0.98-1.27) | 1.45 (1.24-1.69) |
|                                 | Intermediate            | 1.00                | (0.98-1.02) | 1.03 (0.97-1.09)             | 0.93 (0.85-1.01) | 0.98 (0.86-1.11) |
| 45-64                           | Complex                 | 0.99                | (0.93-1.06) | 1.10 (0.98-1.23)             | 1.22 (0.99-1.50) | 1.42 (1.19-1.69) |
|                                 | Intermediate            | 0.99                | (0.97-1.02) | 1.02 (0.97-1.06)             | 1.00 (0.88-1.14) | 1.04 (0.94-1.15) |
| >64                             | Complex                 | 0.97                | (0.91-1.04) | 1.03 (0.92-1.15)             | 1.11 (0.86-1.44) | 1.35 (1.11-1.64) |
|                                 | Intermediate            | 0.98                | (0.95-1.01) | 0.99 (0.94-1.04)             | 0.99 (0.87-1.13) | 0.94 (0.86-1.04) |
| <b><i>P for Interaction</i></b> |                         | 0.18                |             | 0.0004                       | 0.5              | 0.99             |

CI- confidence interval, ED- emergency department, HR- hazard ratio in strata under interaction. Adjusted for: sex, residence peripherality, ethnicity, other congenital defects, comorbidity, health service provider, geographical periphery index, ethnicity, other congenital defects, and baseline comorbidity.

**Table S5. Sensitivity analysis- Multivariable adjusted recurrent health service hazard ratio- Excluding patients identified solely by ASD/PFO.**

|                                                            | <b>Primary care visits</b> | <b>Outpatient Cardiology visits</b> | <b>ED visits*</b> | <b>Hospitalizations</b> |
|------------------------------------------------------------|----------------------------|-------------------------------------|-------------------|-------------------------|
|                                                            | <b>HR (95% CI)</b>         | <b>HR (95% CI)</b>                  | <b>HR(95% CI)</b> | <b>HR(95% CI)</b>       |
| <b>Age (ref=18-24)</b>                                     |                            |                                     |                   |                         |
| 25-44                                                      |                            | 1.27 (1.14-1.41)                    |                   |                         |
| 45-64                                                      |                            | 2.15 (1.93-2.40)                    |                   |                         |
| >64                                                        |                            | 2.56 (2.27-2.89)                    |                   |                         |
| <b>Men (Ref=Women)</b>                                     | 0.81 (0.78-0.84)           | 1.16 (1.09-1.23)                    | 0.79 (0.72-0.86)  | 1.06 (0.97-1.16)        |
| <b>Disease complexity (Ref=Simple)</b>                     |                            |                                     |                   |                         |
| Intermediate                                               | 0.98 (0.94-1.02)           | 0.98 (0.92-1.05)                    | 0.98 (0.88-1.09)  | 1.02 (0.91-1.14)        |
| complex                                                    | 1.15 (1.07-1.24)           | 1.39 (1.22-1.57)                    | 1.21 (1.03-1.42)  | 1.75 (1.48-2.07)        |
| <b>Residence locality Peripherality (Ref=Very central)</b> |                            |                                     |                   |                         |
| Central                                                    | 0.99 (0.95-1.04)           | 0.90 (0.83-0.97)                    | 0.66 (0.58-0.74)  | 1.01 (0.89-1.14)        |
| Medium                                                     | 1.07 (1.01-1.13)           | 1.04 (0.95-1.13)                    | 0.90 (0.79-1.02)  | 1.18 (1.04-1.35)        |
| Peripheral                                                 | 1.18 (1.10-1.27)           | 0.88 (0.79-0.99)                    | 0.62 (0.54-0.72)  | 1.04 (0.90-1.22)        |
| Very peripheral                                            | 1.26 (1.06-1.49)           | 0.86 (0.67-1.09)                    | 0.79 (0.56-1.10)  | 1.07 (0.77-1.50)        |
| <b>Residence locality ethnicity (Ref=Jewish)</b>           |                            |                                     |                   |                         |
| Arab                                                       | 1.40 (1.28-1.53)           | 1.16 (1.00-1.35)                    | 1.26 (1.04-1.52)  | 1.49 (1.20-1.84)        |
| Mixed                                                      | 0.98 (0.93-1.03)           | 0.94 (0.87-1.01)                    | 1.13 (1.00-1.26)  | 1.06 (0.95-1.19)        |
| <b>Other congenital defects</b>                            | 1.16 (1.10-1.22)           | 1.14 (1.04-1.25)                    | 1.23 (1.04-1.44)  | 1.05 (0.87-1.26)        |
| <b>Charlson comorbidity score</b>                          | 1.10 (1.08-1.11)           | 1.08 (1.06-1.10)                    | 1.13 (1.09-1.16)  | 1.21 (1.18-1.25)        |

CI- confidence interval; ED-emergency department; HR- Hazard ratios for recurrent visits and hospitalization, computed with cox proportional hazard models accounting for the competing risk of death (see methods); ICU-intensive care unit; Ref-reference. Models were stratified by age groups when the proportional hazard assumption was violated (GP visit, ED visits and hospitalization). In addition to the variables in the table, models were also adjusted for: Health service provider, geographical periphery index, ethnicity, other congenital defects, and baseline comorbidity.



**Figure S1. Health service utilization (number of visits) by age and congenital disease complexity.**

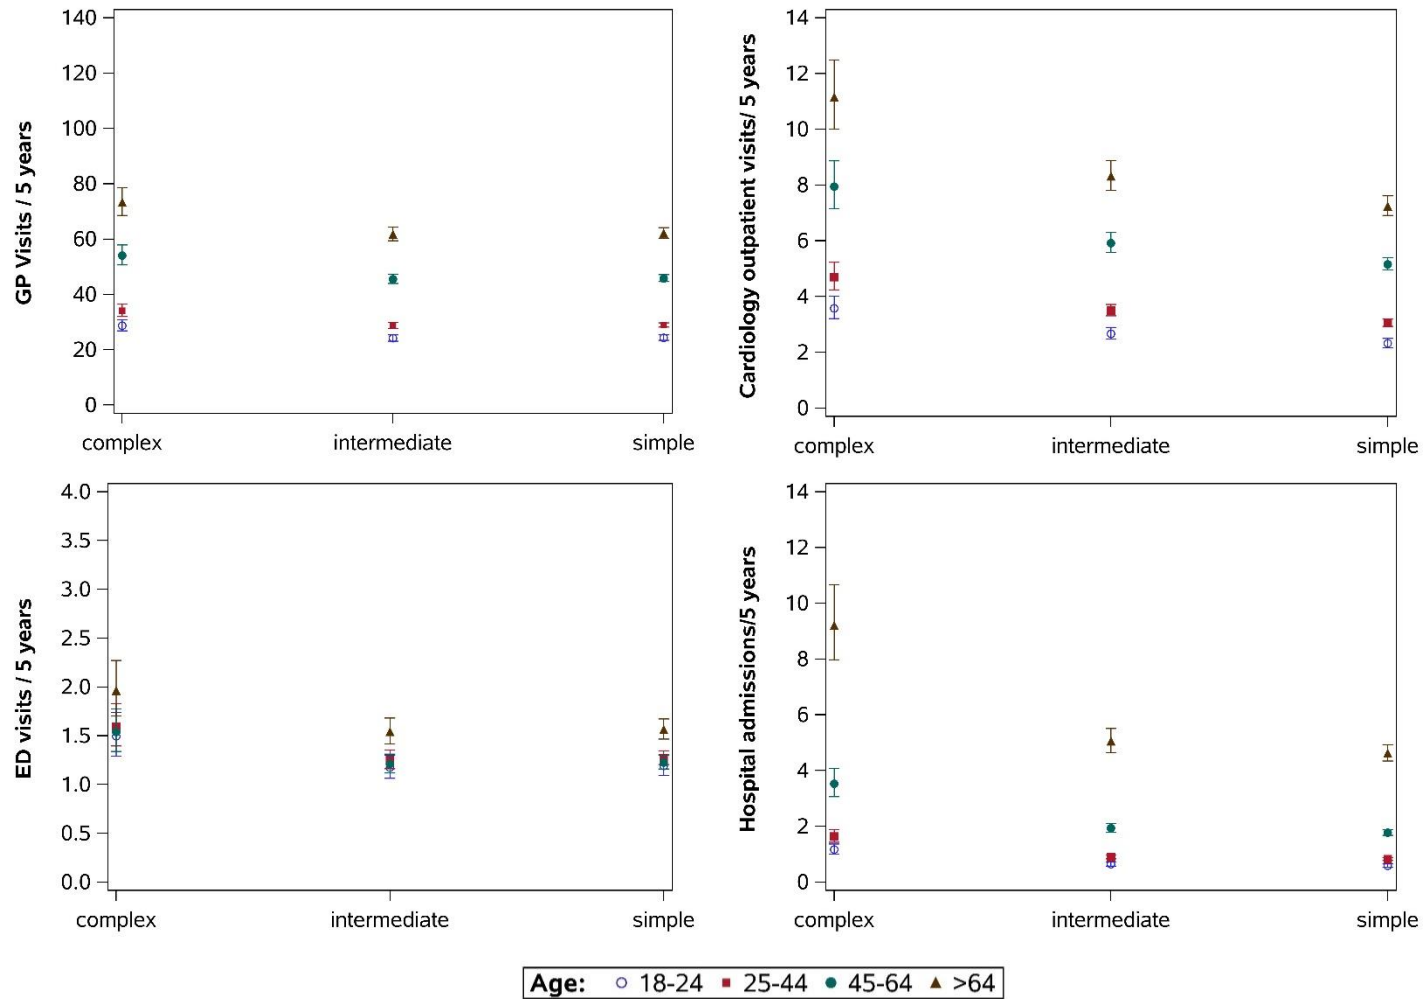

GP- general practice, ED- emergency department.

Figure S2. Multivariable adjusted cumulative expected number of health service utilizations by age.

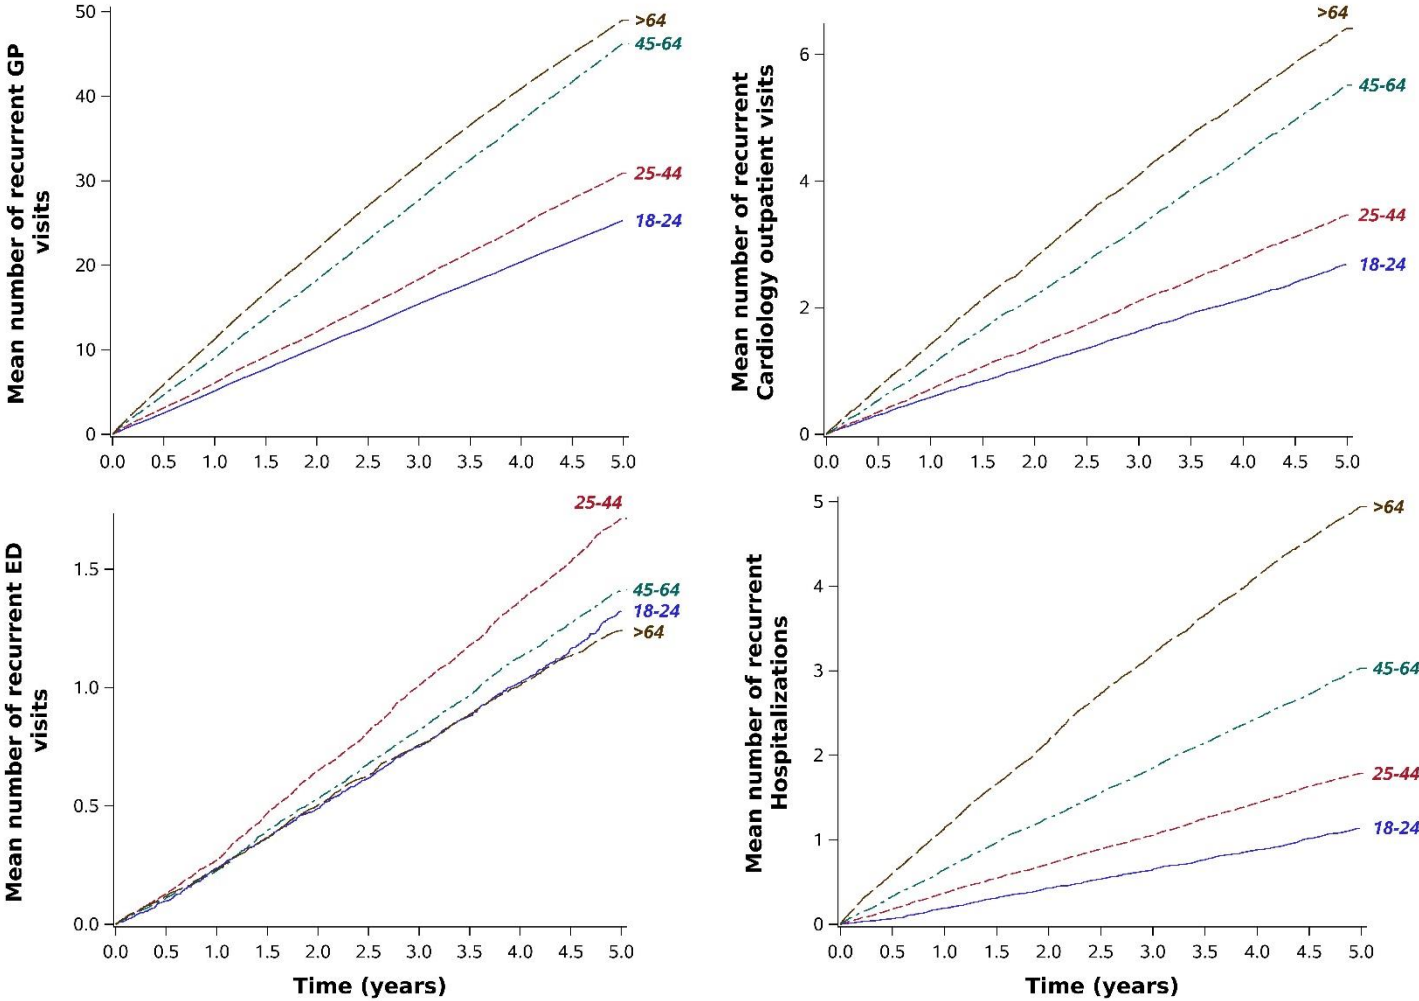

GP- general practice, ED- emergency department.

Figure S3. Multivariable adjusted cumulative expected number of health service utilization by congenital heart disease complexity.

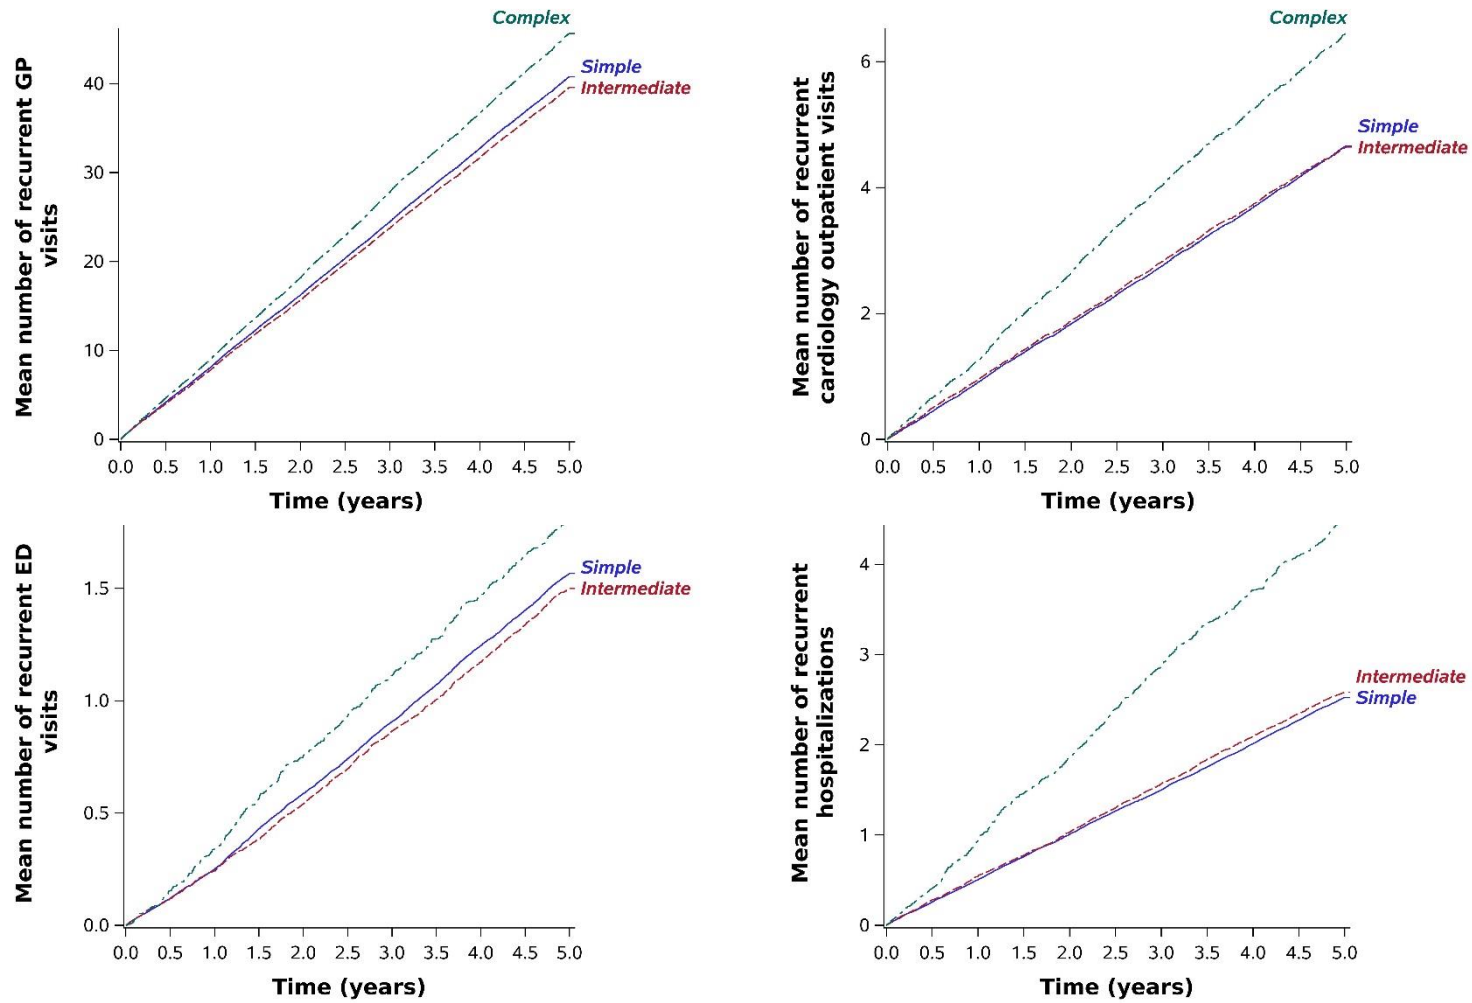

GP- general practice, ED- emergency department

Figure S4. Multivariable adjusted cumulative expected number of health service utilization by sex.

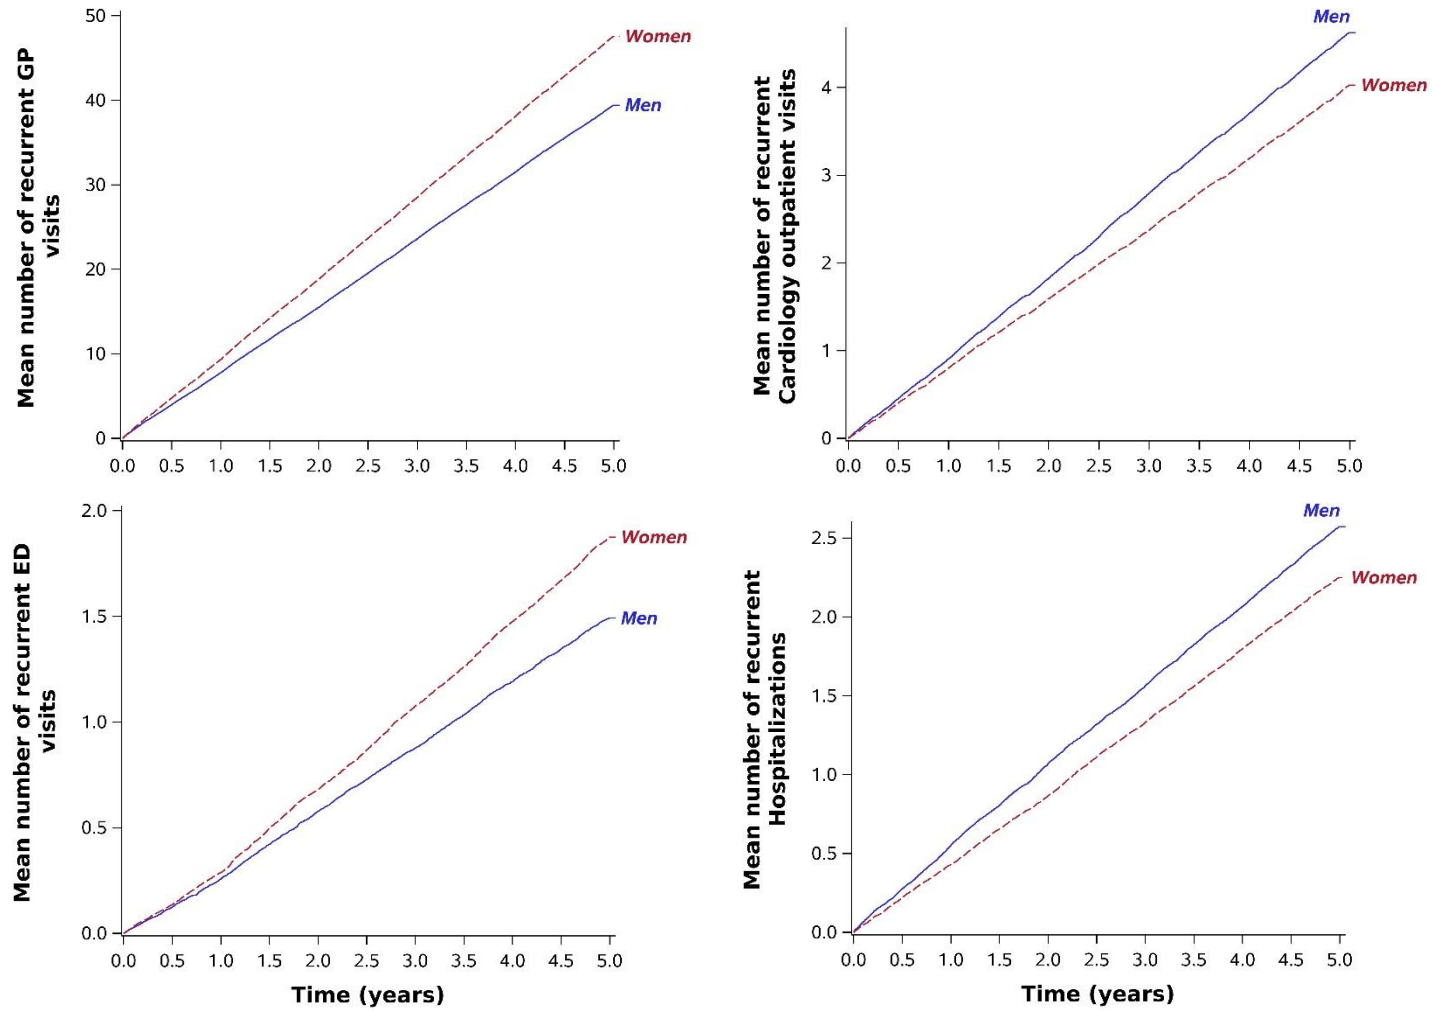

GP- general practice, ED- emergency department.
